# Supplementary material for: Intelligent non-colorimetric indicators for the perishable supply chain by non-wovens with photo-programmed thermal response
Source: PubMed Central journal article supplement (PMC7688929; doi:10.1038/s41467-020-19676-y), 2020-11-25
Supplement: 41467_2020_19676_MOESM2_ESM.pdf [file 41467_2020_19676_MOESM2_ESM.pdf]

## **Description of Additional Supplementary Files**

File Name: Supplementary Movie 1

Description: Device displaying a warning sign upon heating at a temperature of 55°C.
